# Supplementary material for: Aberrant plasma levels of circulating miR-16, miR-107, miR-130a and miR-146a are associated with lymph node metastasis and receptor status of breast cancer patients
Source: PubMed Central journal article supplement (PMC4537022; doi:10.18632/oncotarget.3874), 2015-04-19
Supplement: oncotarget-06-13387-s001.pdf [file oncotarget-06-13387-s001.pdf]

## Aberrant plasma levels of circulating *miR-16*, *miR-107*, *miR-130a* and *miR-146a* are associated with lymph node metastasis and receptor status of breast cancer patients

### Supplementary Material

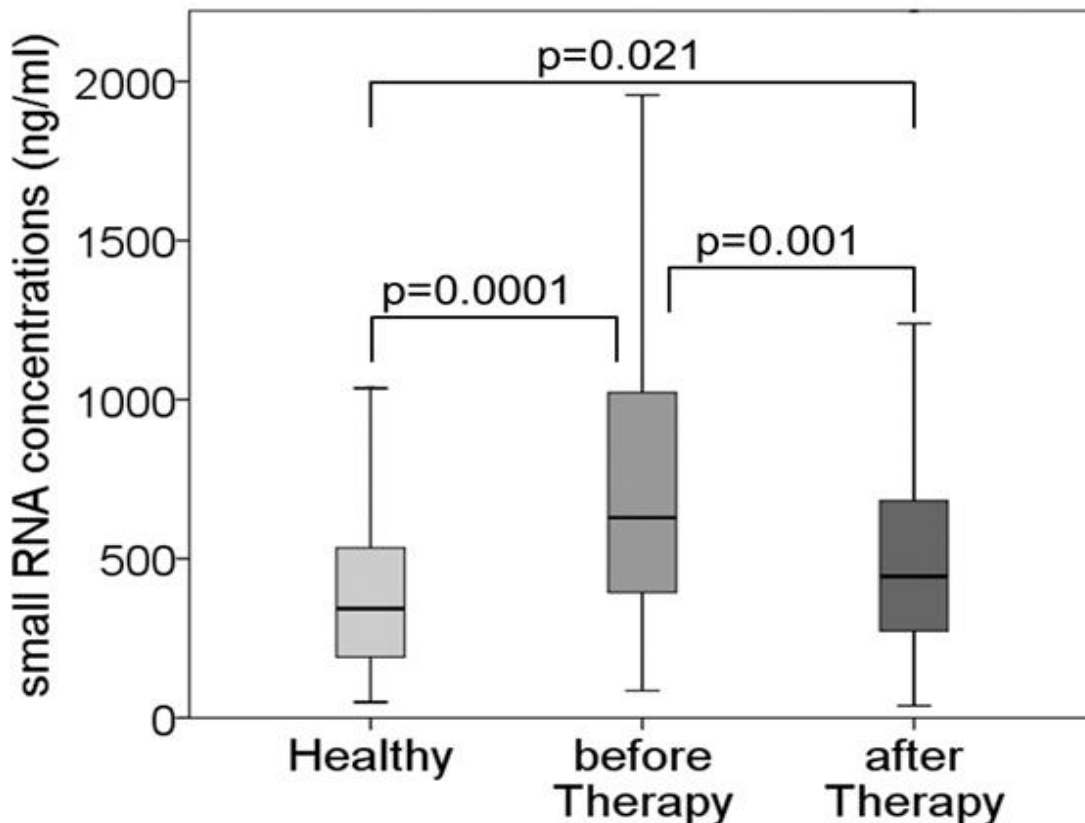

**Supplementary Figure S1: Plasma levels of circulating total small RNA in breast cancer patients before and after chemotherapy.**

The box plot compares the total small RNA concentrations in the plasma of healthy women (n=46) with breast cancer patients before (n=111) and after chemotherapy (n=111). As determined by the Mann-Whitney-U and Wilcoxon test, the significant p-values of the statistical evaluations are indicated.

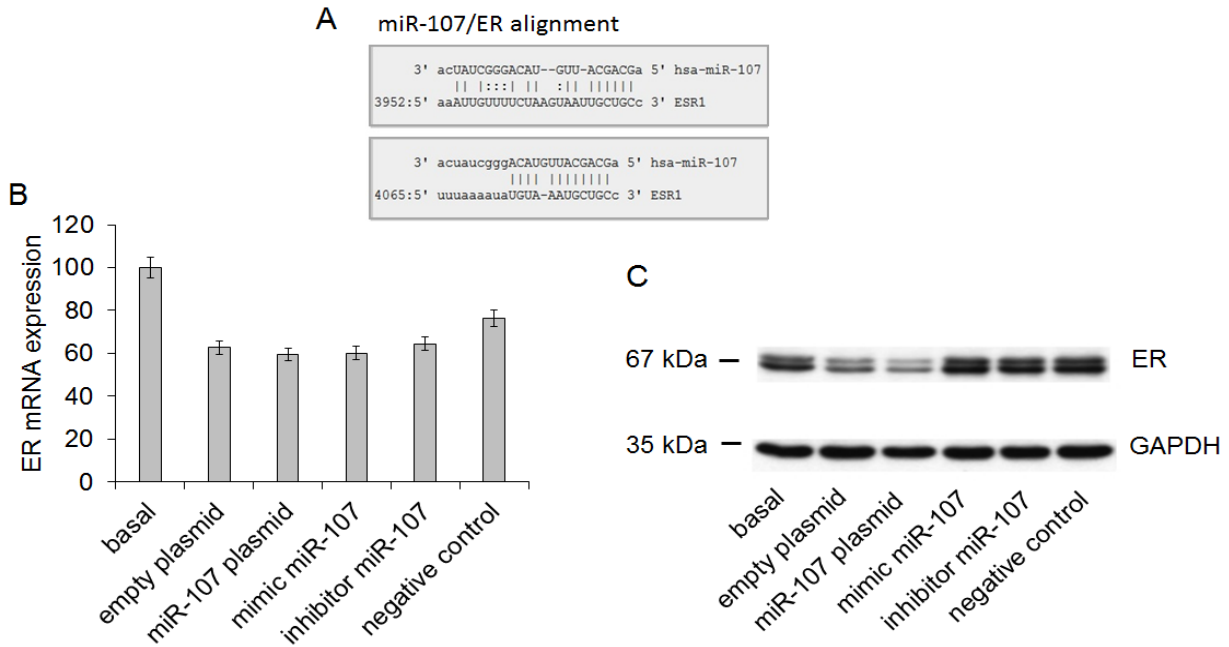

**Supplementary Figure S2: *MiR-107* does not affect the protein expression of ER.**

The alignment of *miR-107*/ER indicates the two putative binding sites for *miR-107* in the 3'UTR of ER (**A**). ER mRNA (**B**) and protein (**C**) levels in MCF-7 cells were analysed by real-time PCR and Western blot, respectively. GAPDH signals of the Western blot served as a loading control. ER mRNA and protein levels in MCF-7 cells untreated (basal) or transfected with an empty expression plasmid, a plasmid encoding for *miR-107*, mimic or inhibitor of *miR-107*, or scramble miR (negative control). A representative gel of three independent experiments is shown, all experiments were performed in duplicate.

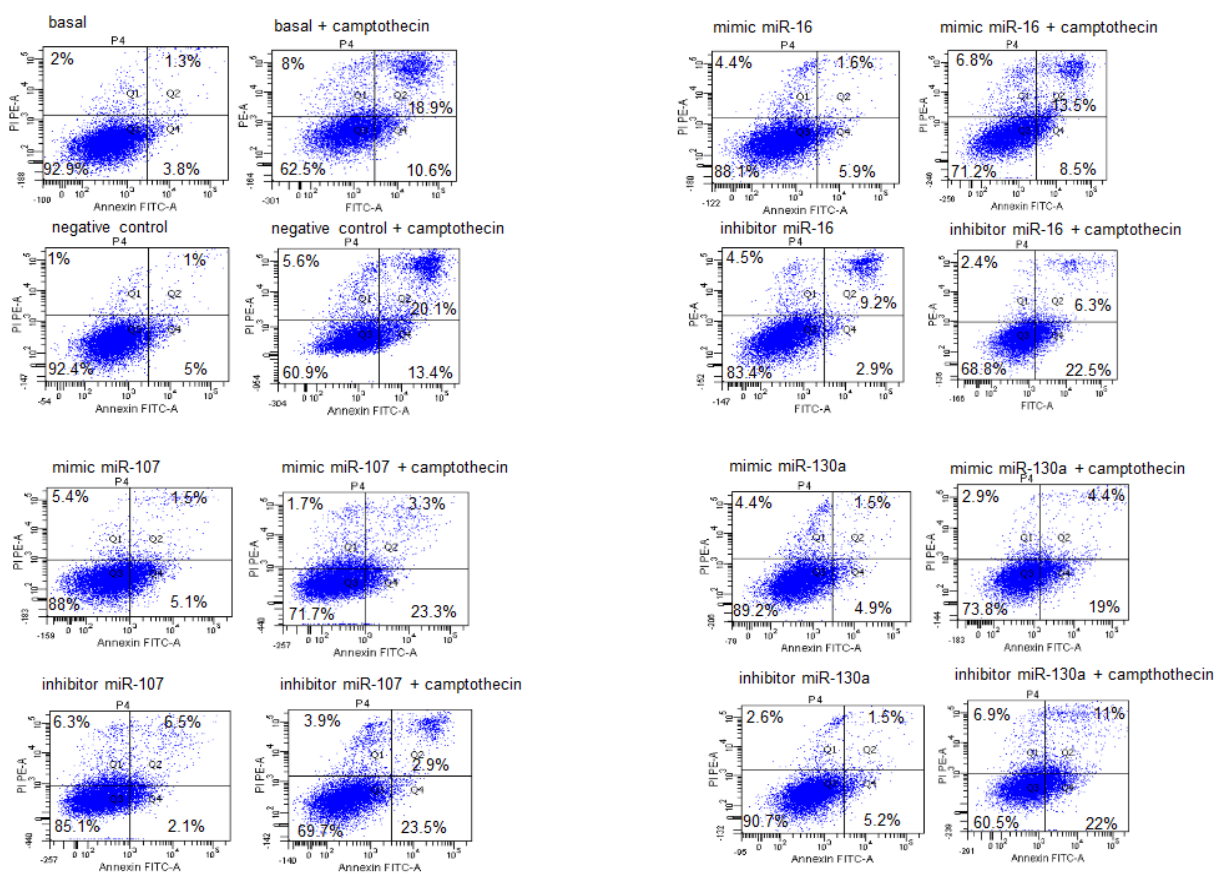

**Supplementary Figure S3: *MiR-16*, *miR-107* and *miR-130a* cannot protect cells against induced apoptosis.**

MCF-7 cells were transfected with mimics and inhibitors of *miR-16*, *miR-107* and *miR-130a* or scramble miR (negative control). Apoptosis in non-transfected and transfected cells was induced by the topoisomerase I inhibitor camptothecin. For FACS analyses on a FACS Cantoll device, cells were labeled with annexin-V-FITC and propidium iodide. Cell fragments, positive for only propidium iodide, can be found in the upper left corner (Q1). Late apoptotic as well as necrotic cells can be found in the upper right corner (Q2), since they are positive for annexin and propidium iodide. Living cells, negative for annexin and propidium iodide, can be found in the lower left corner (Q3). Early apoptotic cells, positive for annexin, are located in the lower right corner (Q4). The size for each population (%) is given in the corresponding area.

### A) miR-16

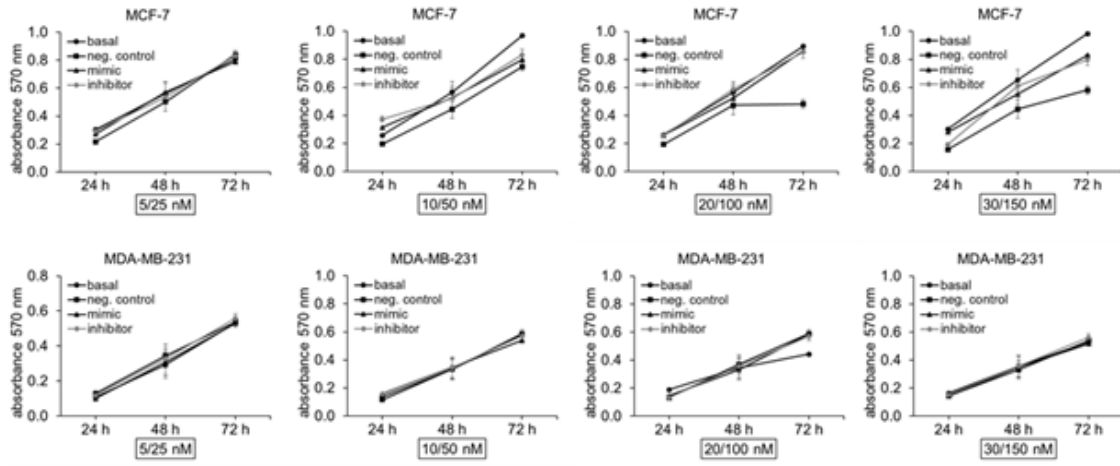

### B) miR-107

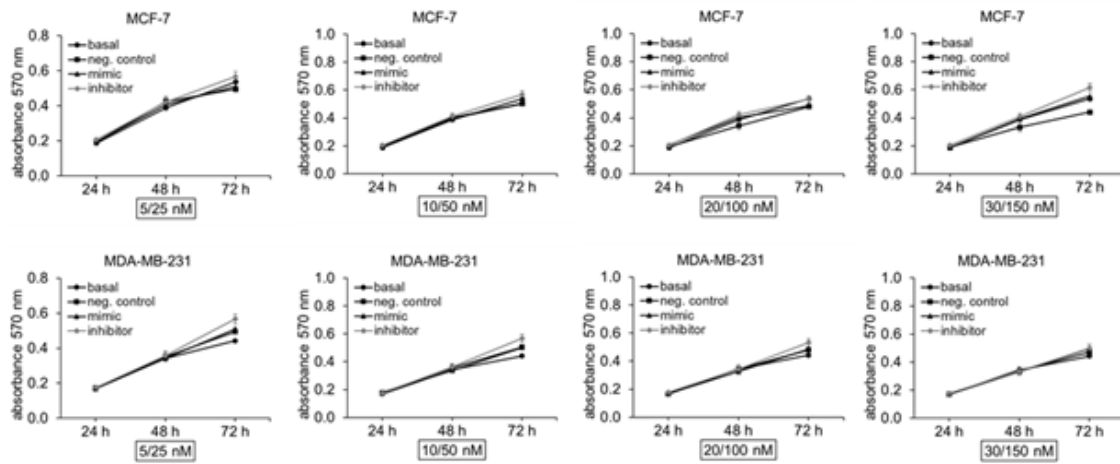

### C) miR-130a

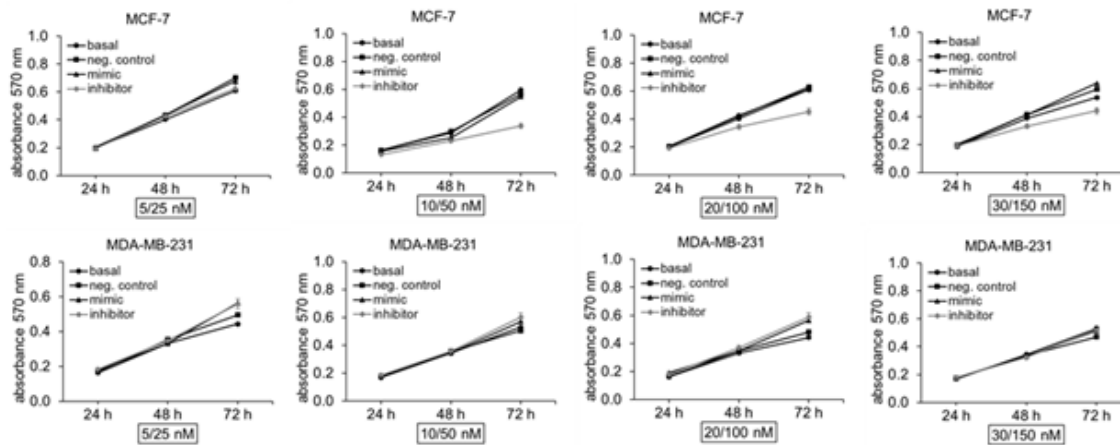

**Supplementary Figure S4: Proliferation of MCF-7 and MDA-MB-231 cells transfected with different concentrations of mimics and inhibitors of *miR-16*, *miR-107* and *miR-130a*.**

MCF-7 and MDA-MB-231 cells were transfected with mimic or inhibitor of *miR-16* (**A**), *miR-107* (**B**) and *miR-130a* (**C**) using four different concentrations 5/25 nM, 10/50 nM, 20/100 nM and 30/150 nM for mimics and inhibitors, respectively. Transfection with scramble miR served as a negative control. Cell proliferation was measured after 24 h, 48 h and 72 h incubation with MTT. Reduced cell proliferation in MCF-7 cells due to the Inhibition of endogenous *miR-130a* was observed for the MCF-7 cells transfected with 50 nM, 100 nM or 150 nM. No significant changes on cell proliferation were observed for *miR-16* and *miR-107* in both cell lines.

**Table S1:** Associations of miR levels with clinicopathological risk factors of patients before chemotherapy.

| Parameters                     | n (%)     | small RNA  | miR-16      | miR-27a     | miR-107                       | miR-130a                 | miR-132                | miR-146a                  |
|--------------------------------|-----------|------------|-------------|-------------|-------------------------------|--------------------------|------------------------|---------------------------|
| <b>Breast cancer patients</b>  |           |            |             |             |                               |                          |                        |                           |
| <b>Total</b>                   | 111 (100) | 647, 834   | 904, 3179   | 64, 405     | Median, Mean, (95% CI) pvalue | 15, 97                   | 2, 9                   | 79, 490                   |
| <b>Age (range 33-76 years)</b> | 56 years  | (703-975)  | (1983-4374) | (145-665)   | 0.4, 1.5<br>(0.6-2.4)         | (19-176)                 | (3-15)                 | (73-908)                  |
| <b>Tumor stage</b>             |           |            |             |             |                               |                          |                        |                           |
| <b>pT1</b>                     | 59 (53)   | 600, 819   | 904, 3696   | 60, 369     | 0.887                         | 0.817                    | 0.575                  | 0.607                     |
|                                |           | (616-1021) | (1758-5635) | (95-644)    | 0.4, 1.3<br>(0.6-2.1)         | 10.3, 61.2<br>(19.6-102) | 2.1, 11<br>(0.7-21)    | 78, 361<br>(74-649)       |
| <b>pT2-4</b>                   | 52 (47)   | 711, 863   | 762, 2568   | 69, 447     | 0.093                         | 0.036                    | 0.027                  | 0.089                     |
|                                |           | (679-1046) | (1259-3877) | (-31-924)   | 0.4, 1.8<br>(0.1-3.6)         | 15.5, 140<br>(-27-307)   | 2.2, 6.5<br>(1.4-11.5) | 78, 642<br>(-218-1502)    |
| <b>Lymph node metastasis</b>   |           |            |             |             |                               |                          |                        |                           |
| <b>N0</b>                      | 71 (64)   | 737, 889   | 1633, 3657  | 94, 493     | 0.093                         | 0.036                    | 0.027                  | 0.089                     |
|                                |           | (719-1059) | (2108-5206) | (99-887)    | 0.4, 1.9<br>(0.6-3.2)         | 21, 109<br>(-5.8-224)    | 3, 12<br>(2.6-21)      | 104, 622<br>(-17-1261)    |
| <b>N1-3</b>                    | 40 (36)   | 481, 745   | 490, 2286   | 43, 240     | 0.275                         | 0.138                    | 0.383                  | 0.084                     |
|                                |           | (510-980)  | (385-4186)  | (93-387)    | 0.2, 0.8<br>(0.3- 1.4)        | 8, 75<br>(-2.2-153)      | 1.4, 3.8<br>(1.9-5.9)  | 43, 245<br>(87-402)       |
| <b>Grading</b>                 |           |            |             |             |                               |                          |                        |                           |
| <b>II</b>                      | 40 (36)   | 558, 732   | 555, 2152   | 52, 171     | 0.275                         | 0.138                    | 0.383                  | 0.084                     |
|                                |           | (537-926)  | (968-3336)  | (84-258)    | 0.3, 0.6<br>(0.3-1)           | 15, 24<br>(14-34)        | 1.4, 3.7<br>(1.5-5.8)  | 54, 155<br>(83-226)       |
| <b>III</b>                     | 71 (64)   | 652, 902   | 1071, 3708  | 225, 523    | 0.252                         | 0.035                    | 0.542                  | 0.082                     |
|                                |           | (716-1089) | (1951-5466) | (121-926)   | 0.4, 2<br>(0.6-3.4)           | 13, 136<br>(13-259)      | 2.5, 12<br>(2.5-21)    | 96, 663<br>(13-1314)      |
| <b>ER status</b>               |           |            |             |             |                               |                          |                        |                           |
| <b>positive</b>                | 50 (45)   | 697, 887   | 717, 2455   | 59, 430     | 0.252                         | 0.035                    | 0.542                  | 0.082                     |
|                                |           | (661-1113) | (894-4016)  | (-58-919)   | 0.1, 1.5<br>(-0.2-3.3)        | 27, 125<br>(-42-292)     | 1.8, 6.2<br>(1-11)     | 40, 620<br>(-258-1498)    |
| <b>negative</b>                | 61 (55)   | 623, 799   | 2569, 3770  | 69, 984     | 0.749                         | 0.748                    | 0.306                  | 0.340                     |
|                                |           | (630-969)  | (1984-5555) | (115-653)   | 0.4, 1.5<br>(0.8-2.3)         | 15, 75<br>(24-126)       | 2.5, 11<br>(1.1-22)    | 99, 385<br>(100-670)      |
| <b>PR status</b>               |           |            |             |             |                               |                          |                        |                           |
| <b>positive</b>                | 35 (32)   | 771, 976   | 859, 4049   | 63, 774     | 0.749                         | 0.748                    | 0.306                  | 0.340                     |
|                                |           | (696-1256) | (1213-6886) | (-54-1602)  | 0.3, 2.4<br>(-0.3-5.1)        | 10, 164<br>(-80-408)     | 3.2, 19<br>(0.03-39)   | 90, 1018<br>(-333-2370)   |
| <b>negative</b>                | 76 (68)   | 566, 777   | 904, 2784   | 65, 237     | 0.058                         | 0.058                    | 0.193                  | 0.025                     |
|                                |           | (622-931)  | (1569-4000) | (152-323)   | 0.4, 1.1<br>(0.6-1.6)         | 38, 67<br>(27-108)       | 1.5, 4.3<br>(3-5.7)    | 76, 251<br>(155-347)      |
| <b>HER2 status</b>             |           |            |             |             |                               |                          |                        |                           |
| <b>positive</b>                | 15 (14)   | 584, 1018  | 1370, 2854  | 71, 934     | 0.934                         | 0.058                    | 0.193                  | 0.025                     |
|                                |           | (469-1567) | (88-5620)   | (-746-2615) | 0.95, 4.6<br>(-1.5-11)        | 43, 331<br>(-238-899)    | 3.6, 13<br>(-4-30)     | 176, 1703<br>(-1331-4737) |
| <b>negative</b>                | 96 (86)   | 649, 810   | 838, 3230   | 63, 320     | 0.720                         | 0.331                    | 0.683                  | 0.916                     |
|                                |           | (674-946)  | (1899-4562) | (144-497)   | 0.3, 1<br>(0.6-1.5)           | 12, 60<br>(24-97)        | 1.8, 8.4<br>(1.8-15)   | 67, 297<br>(112-482)      |
| <b>Triple neg.</b>             |           |            |             |             |                               |                          |                        |                           |
| <b>Triple neg</b>              | 47 (42)   | 572, 747   | 1117, 3032  | 66, 2       | 0.720                         | 0.331                    | 0.683                  | 0.916                     |
|                                |           | (555-939)  | (1606-4458) | (124-322)   | 0.4, 1.1<br>(0.6-1.5)         | 15, 64<br>(9-119)        | 1.9, 4.3<br>(2.7-6)    | 93, 260<br>(134-387)      |
| <b>other receptor statuses</b> | 64 (58)   | 720, 906   | 767, 33     | 61, 538     | 0.039                         | 0.814                    | 0.065                  | 0.177                     |
|                                |           | (714-1098) | (1465-5108) | (91-985)    | 0.3, 1.9<br>(0.4-3.4)         | 13, 1<br>(-10-254)       | 2, 12<br>(2-23)        | 64, 658<br>(-63-1380)     |
| <b>Healthy women</b>           |           |            |             |             |                               |                          |                        |                           |
| <b>Total</b>                   | 46 (100)  | 343, 417   | 300, 483    | 52, 60      | 0.039                         | 0.814                    | 0.065                  | 0.177                     |
| <b>Age (range 50-85 years)</b> | 63 years  | (326-508)  | (294-672)   | (41-79)     | 0.3, 0.6<br>(0.2-1)           | 9, 14<br>(9-18)          | 1.4, 1.7<br>(1.1-2.3)  | 60, 85<br>(58-112)        |

Significant p values in bold; p values as determined by Mann-Whitney-U test. \*Confidence Interval, CI. Median, Mean of relative values.
